# Supplementary material
Source: HighWire-hosted journal article supplement (https://www.rcpjournals.org/highwire/filestream/7151/field_highwire_adjunct_files/0/Posadzki_supp.pdf)
Supplement: Posadzki_supp.pdf [file Posadzki_supp.pdf]

Table S1. Key data from surveys regarding CAM in general.

| Author (year)                | Aim (quote)                                                                                                                            | Population (n) and location                | Method                      | Sampling technique | Question(s) asked (quote)                                                                                   | Response rate (%) | Prevalence of use                     | Most popular modalities (%)                                                                    | Perceived effectiveness (%)                                                                                               | Adverse effects (%) | Costs (£)           | Predictors of CAM use          | Source of CAM recommendation                                                                                                                                | Other relevant findings (%)                                 |
|------------------------------|----------------------------------------------------------------------------------------------------------------------------------------|--------------------------------------------|-----------------------------|--------------------|-------------------------------------------------------------------------------------------------------------|-------------------|---------------------------------------|------------------------------------------------------------------------------------------------|---------------------------------------------------------------------------------------------------------------------------|---------------------|---------------------|--------------------------------|-------------------------------------------------------------------------------------------------------------------------------------------------------------|-------------------------------------------------------------|
|                              |                                                                                                                                        |                                            |                             |                    |                                                                                                             |                   |                                       |                                                                                                |                                                                                                                           |                     |                     |                                |                                                                                                                                                             |                                                             |
| Andrews (2002) <sup>68</sup> | 'To provide some impressionistic evidence on localised trends in older peoples' use [of CAM]'                                          | 400 elderly individuals in England         | Interview and questionnaire | NM                 | NM                                                                                                          | 36                | 12 months: 100<br>2 years: 61.2       | Reflexology: 16.7<br>Massage: 13.6<br>Acupuncture: 8.2<br>Chiropractic: 8.2<br>Aromatherapy: 8 | Claimed CAM made them feel better: 100                                                                                    | NM                  | Per year: 750–1,250 | NM                             | Friend: 35.7<br>GP: 17<br>Magazine: 11.1                                                                                                                    | Claimed to have been using CAM for more than 10 years: 23.4 |
| Anon (2006) <sup>5</sup>     | NM                                                                                                                                     | 5,927                                      | NM                          | NM                 | '... We asked 5,927 Which? members about their experience of using complementary therapies'                 | 55                | 12 months: 100                        | NM                                                                                             | Osteopathy: 69<br>Chiropractic: 69<br>Massage: 50<br>Homeopathy: 45<br>Acupuncture: 42<br>Herbals: 35<br>Aromatherapy: 30 | NM                  | NM                  | NM                             | Using herbal medicine who had not seen a herbal practitioner: 73                                                                                            |                                                             |
| Artus (2007) <sup>69</sup>   | 'To determine CAM use among patients with chronic musculoskeletal pain who have consulted about their pain in primary care'            | 427 pain patients in England               | Interview and questionnaire | NM                 | Treatments used for pain control and consisted of eight questions                                           | 32.3              | Used at least one CAM (12 months): 84 | Massage: 8<br>Acupuncture: 8<br>Aromatherapy: 8                                                | NM                                                                                                                        | Reported harm: 7    | NM                  | Friend/relative: 47<br>CAM: 65 | Current users of CAM: 65                                                                                                                                    |                                                             |
| Badger (2007) <sup>61</sup>  | 'To describe the use of and attitudes towards self-chosen treatments among people who were treated for a recent episode of depression' | 60 depressed patients in England           | Interview                   | NM                 | Questions were used to gain further details of users' perceptions and experiences of care during depression | 34                | 63.3*                                 | Herbals: 28.9<br>Relaxation: 13.1<br>Aromatherapy: 5.2                                         | Yes (qualitative data)                                                                                                    | NM                  | By one patient: 20  | NM                             | 'Use of a range of self-chosen therapies was supported by a belief that they were natural, combined with a desire to avoid consulting health practitioners' |                                                             |
| Baguley (2006) <sup>86</sup> | 'To determine the incidence of use of CTs in patients with vestibular symptoms...'                                                     | 80 patients with vestibular symptoms in UK | Questionnaire               | NM                 | '... a structured set of questions regarding the use of CT...'                                              | NM                | 16                                    | Herbals and acupuncture                                                                        | Claimed CAM helped them: 46                                                                                               | NM                  | NM                  | Personal recommendation: 54    | Tried CAM before seeing GP: 7.6                                                                                                                             |                                                             |

Continues

Table S1. Continued

|                               |                                                                                                                                                           | Main findings                                          |                           |                     |                                                                                                               |                          |                                         |                                                                   |                                             |                     |           |                                   |                                                                                 |                                                                                                  |
|-------------------------------|-----------------------------------------------------------------------------------------------------------------------------------------------------------|--------------------------------------------------------|---------------------------|---------------------|---------------------------------------------------------------------------------------------------------------|--------------------------|-----------------------------------------|-------------------------------------------------------------------|---------------------------------------------|---------------------|-----------|-----------------------------------|---------------------------------------------------------------------------------|--------------------------------------------------------------------------------------------------|
| Author (year)                 | Aim (quote)                                                                                                                                               | Population (n) and location                            | Method                    | Sampling technique  | Question(s) asked (quote)                                                                                     | Response rate (%)        | Prevalence of use                       | Most popular modalities (%)                                       | Perceived effectiveness (%)                 | Adverse effects (%) | Costs (£) | Predictors of CAM use             | Source of CAM recommendation                                                    | Other relevant findings (%)                                                                      |
| Baron (2005) <sup>6</sup>     | '...to investigate the use of CAM by outpatients with general dermatologic conditions in 3 UK cities...'                                                  | 400 dermatology patients in England and 637 in Wales   | NM                        | NM                  | NM                                                                                                            | England: 78<br>Wales: 68 | 12 months: England: 45<br>Wales: 50     | 'Herbal medicine was the most popular CAM in both regions'        | Found CAM helpful: England: 76<br>Wales: 23 | NM                  | NM        | NM                                | Friend or relative: 72<br>Magazine or newspaper: 15<br>Health shop: 13<br>GP: 7 | Thought CAM should be available on NHS: 88                                                       |
| Cheatham (2001) <sup>71</sup> | '...to quantify patient awareness and use of ATs for the prevention and treatment of prostate cancer in the UK'                                           | 195 patients with cancer in England                    | Questionnaire             | NM                  | Whether they had thought of using, or had actually used any CAMs                                              | 86                       | 16.5                                    | Saw palmetto: 18.5                                                | NM                                          | NM                  | NM        | NM                                | Newspaper: 46<br>Friend/relative: 26.8                                          | Aware of ATs for prevention or treatment of prostate cancer: Private practice: 60.4<br>NHS: 46.2 |
| Cinotta (2006) <sup>87</sup>  | 'To compare prevalence, reasons, motivations, initiation, perceived helpfulness, and communication of CAM use between two tertiary children's hospitals.' | 500 children with various clinical conditions in Wales | Interview questionnaire   | Non-random sampling | 'If the child had used CAM in the past year...'                                                               | NM                       | 12 months: 41                           | Herbals: 10<br>Aromatherapy: 5<br>Homeopathy: 4<br>Reflexology: 3 | NM                                          | NM                  | NM        | Tertiary-educated mother (p=0.02) | Parent/patient or family/friends: 74                                            | Did not disclose CAM use to medical practitioners: 66                                            |
| Clare (2010) <sup>8</sup>     | '...to evaluate the usage and reported satisfaction of the various CTs used by patients in both the in-patient and outpatient setting(s)'                 | 168 patients with cancer in England                    | Self-report questionnaire | Non-random sampling | '...a combination of closed, multiple choice, a free text opinion option, and a ten-point satisfaction scale' | 93                       | Previously received CAM at hospital: 58 | Reiki: 75                                                         | NM                                          | NM                  | NM        | NM                                | NM                                                                              | Extremely likely to request more CAM therapy in future: 76                                       |

Continues

Table S1. Continued

| Author (year)                 | Aim (quote)                                                                                                                                                  | Population (n) and location         | Method               | Sampling technique  | Question(s) asked (quote)                                                                     | Response rate (%) | Prevalence of use                                                                          | Most popular modalities (%)                                                                           | Perceived effectiveness (%)                            | Adverse effects (%)         | Main findings                           |                                               |                                                                                                |                                                                                                        |                                                                                           |                                                             |                                                                         |
|-------------------------------|--------------------------------------------------------------------------------------------------------------------------------------------------------------|-------------------------------------|----------------------|---------------------|-----------------------------------------------------------------------------------------------|-------------------|--------------------------------------------------------------------------------------------|-------------------------------------------------------------------------------------------------------|--------------------------------------------------------|-----------------------------|-----------------------------------------|-----------------------------------------------|------------------------------------------------------------------------------------------------|--------------------------------------------------------------------------------------------------------|-------------------------------------------------------------------------------------------|-------------------------------------------------------------|-------------------------------------------------------------------------|
|                               |                                                                                                                                                              |                                     |                      |                     |                                                                                               |                   |                                                                                            |                                                                                                       |                                                        |                             | Costs (£)                               | Predictors of CAM use                         | Source of CAM recommendation                                                                   | Other relevant findings (%)                                                                            |                                                                                           |                                                             |                                                                         |
| Corner (2009) <sup>9</sup>    | '...to assess the prevalence of CAM use in a representative cancer population prior to and within 6 months of diagnosis.'                                    | 304 patients with cancer in England | Postal questionnaire | Non-random sampling | NM                                                                                            | 51                | Used CAM before diagnosis: 32<br>Used CAM after diagnosis: 28.9                            | Reflexology: 35<br>Aromatherapy: 30<br>Herbal medicine: 25                                            | NM                                                     | NM                          | NM                                      | NM                                            | NM                                                                                             | NM                                                                                                     | Highly educated women with early stage cancer (after diagnosis)                           | Friends: 28.4<br>Self-education: 27<br>Family: 25.0         | Had used CAM since diagnosis and not informed health professional: 26.1 |
| Coulson (2005) <sup>10</sup>  | '...to compare the prevalence of CAM use among infertility patients in National Health Service (NHS) and private clinics.'                                   | 400 infertility patients in England | Questionnaire        | NM                  | 'Have you tried any of the following complementary therapies to help your fertility problem?' | 83                | 3 months: Private sector: Male: 13<br>Female: 40<br>NHS: Male: 12<br>Female: 23 (3 months) | NM                                                                                                    | Found CAM helpful for infertility: 10                  | NM                          | NM                                      | NM                                            | NM                                                                                             | NM                                                                                                     | NM                                                                                        | Patients had used CAM for other health problems in past: 19 |                                                                         |
| Crawford (2006) <sup>11</sup> | '... to examine the use of CAM by children and adolescents with a wide spectrum of acute and chronic medical problems in a tertiary care'                    | 580 paediatric patients in Wales    | Interview            | Non-random sampling | NM                                                                                            | NM                | 12 months: 41<br>1 month: 26                                                               | Herbals: 10<br>Aromatherapy: 5<br>Reflexology: 3                                                      | At least one CAM perceived as helpful by users: 57     | Experienced side effects: 5 | Median for medicinal CAM per month: 1-4 | Higher income and parental tertiary education | Self- initiation, parent, participant, family, friend: 74<br>CAM practitioner: 14<br>Doctor: 6 | Did not disclose CAM use to their doctor: 66<br>Using herbs and prescription medicines concurrently: 3 |                                                                                           |                                                             |                                                                         |
| Daley (2006) <sup>33</sup>    | '...to determine the prevalence of using CAM and NPI for menopausal symptoms; describe the perceived effectiveness of CAM and NPI for symptom management...' | 2,399 menopausal women in England   | Postal questionnaire | Non-random sampling | 'Was it helpful?'                                                                             | 50.3              | NM                                                                                         | Yoga: 41.5<br>Relaxation: 27.4<br>Homeopathy/ aromatherapy: 25.4<br>Exercise 76.5<br>Homeopathy: 58.7 | Prayer: 86.4<br>Relaxation: 82.5<br>Aromatherapy: 79.2 | NM                          | NM                                      | NM                                            | NM                                                                                             | Physically active and not smoking whites                                                               | Women who consumed 1-7 units of alcohol/week more likely to use homeopathy or naturopathy |                                                             |                                                                         |
| Domoney (2003) <sup>88</sup>  | To 'investigate the use of CTS by women attending a specialist PMS clinic in the UK'                                                                         | 100 patients with PMS in UK         | Questionnaire        | NM                  | '...questionnaire detailing previous use of CTS...'                                           | 100               | Ever used: 91<br>Current users: 35                                                         | Herbals                                                                                               | Felt CAM was of benefit: 53                            | NM                          | NM                                      | NM                                            | NM                                                                                             | NM                                                                                                     | Friends/relatives: 62<br>Media: 37<br>GP: 24                                              | Used prescribed medication concomitantly: 71                |                                                                         |

Continues

Table S1. Continued

| Main findings                     |                                                                                                                    |                                                             |                          |                            |                                                                          |                   |                                             |                                                                                                |                                                        |                     |                                    |                                                             |                                               |                                                                                                                       |
|-----------------------------------|--------------------------------------------------------------------------------------------------------------------|-------------------------------------------------------------|--------------------------|----------------------------|--------------------------------------------------------------------------|-------------------|---------------------------------------------|------------------------------------------------------------------------------------------------|--------------------------------------------------------|---------------------|------------------------------------|-------------------------------------------------------------|-----------------------------------------------|-----------------------------------------------------------------------------------------------------------------------|
| Author (year)                     | Aim (quote)                                                                                                        | Population (n) and location                                 | Method                   | Sampling technique         | Question(s) asked (quote)                                                | Response rate (%) | Prevalence of use                           | Most popular modalities (%)                                                                    | Perceived effectiveness (%)                            | Adverse effects (%) | Costs (£)                          | Predictors of CAM use                                       | Source of CAM recommendation                  | Other relevant findings (%)                                                                                           |
| Easterford (2005) <sup>12</sup>   | '...to ascertain the use of CAM in consecutive patients attending epilepsy in specialist epilepsy England clinics' | 400 patients with epilepsy in England                       | Structured questionnaire | NM                         | 'The question about seizure frequency and CAM use'                       | 94.25             | Used CAMs at one point: 34.6                | NM                                                                                             | NM                                                     | NM                  | Majority spent less than £1/week   | NM                                                          | Friend: 22.9<br>Doctor: 16.3                  | Used CAM at some time specifically for their epilepsy: 11.1                                                           |
| Emslie (2002) <sup>34</sup>       | 'To assess changes in awareness of, use of, attitudes to, and opinions about CAM'                                  | 800 healthy responders in Scotland                          | Postal questionnaire     | Stratified random sampling | NM                                                                       | 54                | Used at least one type of CAM (6 years): 41 | Aromatherapy: 18<br>Osteopathy: 12<br>Acupuncture: 10<br>Homeopathy: 10<br>Reflexology: 9      | Found CAM very effective: 48.2                         | NM                  | Concerned with cost of therapy: 22 | NM                                                          | NM                                            | Indicated GP was aware they were using CAM: 38                                                                        |
| Ernst (2000) <sup>2</sup>         | '...to determine the use of CAM'                                                                                   | 1,204 patients with various clinical conditions in UK       | Telephone interview      | Random sampling            | NM                                                                       | NM                | 12 months: 20                               | Herbal medicine<br>Aromatherapy<br>Homeopathy<br>Acupuncture/<br>Massage<br>Reflexology        | 25% stated that CAM helps or relieves injury/condition | NM                  | Per month: 13.62±1.61              | Middle-aged women in higher social classes                  | Doctor: 11                                    | Use was highest in Wales (32%) and South East England (23%) and lowest in West Midlands (16%) and North England (11%) |
| Esmonde (2008) <sup>72</sup>      | 'To provide increased insight into benefits from CAM use and service user ideas over research priorities'          | 1,000 patients with MS in England                           | Questionnaire            | NM                         | Questions on use of any of a set of CAMs in past 12 months               | 13.8              | 12 months: 84                               | Reflexology: 40<br>Massage: 33<br>Yoga: 31<br>Relaxation and meditation: 25<br>Acupuncture: 21 | Qualitative data                                       | NM                  | NM                                 | NM                                                          | NM                                            | One quarter to two-fifths of respondents rated each of six therapies as 'extremely helpful'                           |
| Featherstone (2002) <sup>35</sup> | To describe 'the prevalence and nature of CAM use in patients in six different practices'                          | 1,987 primary care patients in Scotland                     | Postal questionnaire     | Non-random sampling        | NM                                                                       | 77                | 1 month: 39<br>Lifetime: 71                 | NM                                                                                             | NM                                                     | NM                  | NM                                 | Association between CAM use, sex, age, education and income | NM                                            | Had used one or more CAM therapies: 48<br>Had used CAM remedies: 64                                                   |
| Featherstone (2003) <sup>74</sup> | 'To study the nature of CAM use in primary care attenders...'                                                      | 2,032 patients with various clinical conditions in Scotland | Postal questionnaire     | NM                         | Questionnaire developed from two previous prevalence studies in Grampian | 59                | Lifetime: 71                                | Aromatherapy: 23.7<br>Homeopathy: 15.6<br>Acupuncture: 14.4<br>Osteopathy: 13<br>Herbals: 11.4 | Scored ≥7 (on 10-point Likert-like scale): 53          | NM                  | NM                                 | NM                                                          | Non-NHS therapist: 24<br>NHS professional: 13 | Stated GP knew of CAM use: 35                                                                                         |

Continues

Table S1. Continued

| Main findings                 |                                                                                                                             |                                                  |                             |                     |                                                                                                              |                   |                                   |                                                                                              |                                                                             |                     |           |                                                   |                              |                                                                                     |
|-------------------------------|-----------------------------------------------------------------------------------------------------------------------------|--------------------------------------------------|-----------------------------|---------------------|--------------------------------------------------------------------------------------------------------------|-------------------|-----------------------------------|----------------------------------------------------------------------------------------------|-----------------------------------------------------------------------------|---------------------|-----------|---------------------------------------------------|------------------------------|-------------------------------------------------------------------------------------|
| Author (year)                 | Aim (quote)                                                                                                                 | Population (n) and location                      | Method                      | Sampling technique  | Question(s) asked (quote)                                                                                    | Response rate (%) | Prevalence of use                 | Most popular modalities (%)                                                                  | Perceived effectiveness (%)                                                 | Adverse effects (%) | Costs (£) | Predictors of CAM use                             | Source of CAM recommendation | Other relevant findings (%)                                                         |
| Ferry (2002) <sup>75</sup>    | To explore 'the use of different modalities of CTs in consecutive patients with a diagnosis of Parkinson's disease'         | 109 patients with Parkinson's disease in England | Interview                   | NM                  | Participants asked about current and previous use of CTs in general and for treatment of Parkinson's disease | 90                | Used at least one form of CAM: 54 | Massage: 16<br>Aromatherapy: 14<br>Reflexology: 7<br>Acupuncture: 7<br>Spiritualism: 7       | NM                                                                          | NM                  | NM        | NM                                                | NM                           | Used solely for treatment of Parkinson's disease: 38.7                              |
| Freymann (2006) <sup>36</sup> | 'To analyse the knowledge about and use of CAM in an ethnically diverse student population'                                 | 264 students in England                          | Questionnaire and interview | NM                  | NM                                                                                                           | 59.1              | 12 months: 32.6                   | Aromatherapy: 26.8<br>TCM: 25<br>Herbals: 25<br>Ayurvedic medicine: 19.6<br>Homeopathy: 14.3 | NM                                                                          | NM                  | NM        | NM                                                | NM                           | Considered plants and natural products as good to excellent healthcare products: 46 |
| Furnham (2000) <sup>37</sup>  | To examine 'whether people thought neurotics were more likely to 'get better' when using CAM rather than orthodox medicine' | 165 neurotic participants                        | Questionnaire               | Non-random sampling | 'How effective do you think the treatment was?'                                                              | NM                | Lifetime: 53.9                    | NM                                                                                           | Patients using CAM believed homeopathy was more effective than OM (p<0.001) | NM                  | NM        | NM                                                | NM                           | Believed homeopathy should be freely available on NHS: 73.9                         |
| Gage (2009) <sup>39</sup>     | 'To estimate the proportion of cancer outpatients who visit a CAM unit...'                                                  | 464 cancer patients                              | Questionnaire               | NM                  | 'To state their reason for visiting the CAM unit on that day'                                                | NM                | 6 months: 36                      | Reflexology and aromatherapy: 10                                                             | NM                                                                          | NM                  | NM        | Women with higher education diagnosed with cancer | NM                           | Used CAM unit facilities while waiting for NHS appointments: almost 60              |
| Gami (2003) <sup>80</sup>     | '...to identify the sources from which patients sought advice, either 'orthodox' or 'complementary [practitioner]'          | 107 radiotherapy patients in England             | Interview                   | NM                  | Who they had seen about these symptoms, including any CAM practitioners                                      | NM                | Patients with GI symptoms: 13     | Homeopathy: 28.<br>Faith healer: 21.4<br>Herbals: 21.4                                       | Found CAM helpful: 88                                                       | NM                  | NM        | NM                                                | NM                           | CAM most frequently used by women aged 31-69 years                                  |

Continues

**Table S1. Continued**

| Main findings                     |                                                                                                                                               |                                              |                      |                     |                                                                                                                                             |                   |                                              |                                                                                                 |                                          |                     |           |                                                     |                              |                                                                                      |
|-----------------------------------|-----------------------------------------------------------------------------------------------------------------------------------------------|----------------------------------------------|----------------------|---------------------|---------------------------------------------------------------------------------------------------------------------------------------------|-------------------|----------------------------------------------|-------------------------------------------------------------------------------------------------|------------------------------------------|---------------------|-----------|-----------------------------------------------------|------------------------------|--------------------------------------------------------------------------------------|
| Author (year)                     | Aim (quote)                                                                                                                                   | Population (n) and location                  | Method               | Sampling technique  | Question(s) asked (quote)                                                                                                                   | Response rate (%) | Prevalence of use                            | Most popular modalities (%)                                                                     | Perceived effectiveness (%)              | Adverse effects (%) | Costs (£) | Predictors of CAM use                               | Source of CAM recommendation | Other relevant findings (%)                                                          |
| Gerasi midis (2007) <sup>76</sup> | 'To assess prevalence, predictors and parental attitude to the use of CAM in a paediatric population with inflammatory bowel disease'         | 135 paediatric patients with IBD in Scotland | Questionnaire        | NM                  | 'To report sources of information on CAM, reasons they had chosen these, their effectiveness, cost and doctor's awareness of their CAM use' | 83                | Lifetime: 61<br>Current users: 37            | Homeopathy: 14<br>Massage: 13<br>Aromatherapy: 9<br>Yoga: 6<br>Relaxation: 6                    | Judged CAM to be partially effective: 48 | NM                  | NM        | Aged <46 years with high parental educational level | NM                           | Would give CAM to their children: 89                                                 |
| Gohar (2008) <sup>77</sup>        | '...to determine the prevalence of self-care behaviours in patients attending a secondary care hypertension clinic.'                          | 196 patients with hypertension in England    | Questionnaire        | NM                  | Responders asked about any CAM use over the past year                                                                                       | 78.8              | 12 months: 43.1                              | Prayer: 12.4<br>Relaxation: 8.5<br>Aromatherapy: 4.6<br>Meditation: 2.6<br>Spiritual healing: 2 | NM                                       | NM                  | NM        | NM                                                  | NM                           | CAM users had lower adherence to medication than non-CAM users (44.8 vs 60.5)        |
| Greenfield (2008) <sup>40</sup>   | '...to explore the use of CAM, self-test kits and attitudes towards health of UK patients one year after referral to cardiac rehabilitation.' | 463 patients in England                      | NM                   | NM                  | 'Have you used any CAMs for your heart problems?'                                                                                           | 91.1              | 12 months: 9.2                               | NM                                                                                              | NM                                       | NM                  | NM        | Attitude to CAM                                     | NM                           | Used CAM to manage cardiac problems: 28.2<br>Used CAM to treat other illnesses: 82.1 |
| Haetzman (2003) <sup>41</sup>     | '... to determine the use of conventional and alternative practitioners and medicines amongst individuals with chronic pain in the community' | 2,184 patients with pain in Scotland         | Postal questionnaire | Non-random sampling | NM                                                                                                                                          | 83                | Consulted CAM practitioner (12 months): 18.2 | NM                                                                                              | NM                                       | NM                  | NM        | Younger females                                     | NM                           | Individuals with chronic pain who had taken CAM: 15.7                                |
| Harding (2009) <sup>78</sup>      | 'To generate preliminary data on [CAM] modalities chosen to treat specific running injuries'                                                  | 100 runners with sport injuries in England   | Questionnaire        | NM                  | Treatment modalities chosen, attitudes and perceived level of effectiveness of treatment                                                    | 99                | 12 months: 21                                | Massage: 12<br>Chiropractic: 11<br>Acupuncture: 9<br>Osteopathy: 3                              | NM                                       | NM                  | NM        | NM                                                  | NM                           | Would like to see CAM available on NHS: 84                                           |

Continues

Table S1. Continued

| Author (year)                  | Aim (quote)                                                                                                            | Population (n) and location                          | Method               | Sampling technique                                  | Question(s) asked (quote)                                                     | Response rate (%) | Prevalence of use                               | Most popular modalities (%)                                                                   | Perceived effectiveness (%)                      | Adverse effects (%)                            | Costs (£)     | Predictors of CAM use                                                                            | Source of CAM recommendation                                                                                          | Other relevant findings (%)                                              |
|--------------------------------|------------------------------------------------------------------------------------------------------------------------|------------------------------------------------------|----------------------|-----------------------------------------------------|-------------------------------------------------------------------------------|-------------------|-------------------------------------------------|-----------------------------------------------------------------------------------------------|--------------------------------------------------|------------------------------------------------|---------------|--------------------------------------------------------------------------------------------------|-----------------------------------------------------------------------------------------------------------------------|--------------------------------------------------------------------------|
|                                |                                                                                                                        |                                                      |                      |                                                     |                                                                               |                   |                                                 |                                                                                               |                                                  |                                                |               |                                                                                                  |                                                                                                                       |                                                                          |
| Harris (2003) <sup>42</sup>    | 'To determine the prevalence and cost of CAM use...'                                                                   | 1,697 patients with cancer in Wales                  | Questionnaire        | NM                                                  | Questionnaire included CAM types most commonly identified in previous studies | 64                | Used at least one type of CAM (12 months): 49.6 | Herbals or homeopathy: 13<br>Relaxation: 11.2<br>Aromatherapy/massage: 8.8                    | Satisfied with dietary supplements: 64           | NM                                             | Per month: 28 | Younger women with higher education and previous CAM use                                         | NM                                                                                                                    | Satisfied with CAM: 72                                                   |
| Helpman (2010) <sup>79</sup>   | '...to compare the patterns of CAM use and attitudes to ward CAM use among patients with epithelial ovarian cancer...' | 98 patients with cancer in the UK                    | Questionnaire        | NM                                                  | NM                                                                            | NM                | 37                                              | Evening primrose: 19                                                                          | Found CAM to be helpful: 79                      | NM                                             | NM            | NM                                                                                               | NM                                                                                                                    | Informed doctors of CAM use: 81                                          |
| Heuschkel (2002) <sup>89</sup> | 'To examine the use of CAM in children and young adults with IBD'                                                      | 51 paediatric and adult patients with IBD in England | Questionnaire        | Non-random sampling                                 | Questionnaire to determine the prevalence of CAM use during previous year     | 25                | 41                                              | Herbals: 14<br>Homeopathy: 6                                                                  | Mean 2.25 (maximum 3, minimum 1)                 | Three AEs listed by >30% of patients using CAM | NM            | Parental use of CAM and number of AEs from conventional medicines                                | Doctors: 3.5<br>Maximum: 5<br>Minimum: 1                                                                              | Had initiated a discussion about CAM:<br>Doctors: 8<br>Patients: 24      |
| Hunt (2010) <sup>44</sup>      | '...to provide lifetime and 12-month prevalence data for CAM use and CAM practitioner consultations in England'        | 7,200 households in England                          | Postal questionnaire | Random, multi-stage stratified probability sampling | NM                                                                            | 71                | 12 months: 26.3<br>Lifetime: 44.0               | Massage: 13.1<br>Aromatherapy: 11.2<br>Acupuncture: 11.2<br>Relaxation: 10<br>Osteopathy: 9.9 | NM                                               | NM                                             | NM            | University-educated women with poorer mental health and lower levels of perceived social support | Doctors: 3.5<br>Maximum: 5<br>Minimum: 1                                                                              | Respondents taking prescription drugs had used CAM in past 12 months: 29 |
| Jacobs (2001) <sup>45</sup>    | 'To explore women's use and interest in, OTC supplements and CAMs...'                                                  | 1,143 women                                          | Questionnaire        | NM                                                  | NM                                                                            | NM                | Women (regularly): 46                           | NM                                                                                            | Believed CAM was effective alternative to OM: 82 | NM                                             | NM            | NM                                                                                               | NM                                                                                                                    | Would use CAMs for relief of menopausal symptoms: 64                     |
| Johnston (2003) <sup>47</sup>  | 'To qualify and quantify the usage of CM in children with [AD] in secondary care England'                              | 100 paediatric dermatology patients in England       | Interview            | Non-random sampling                                 | 'Do you think CM works better than Western medicine?'                         | 100               | Previously used some form of CM: 39             | Chinese herbals: 43<br>Herbals: 41<br>Homeopathy: 35                                          | Felt CAM was more efficacious: 14                | NM                                             | NM            | Ethnicity (non-local)                                                                            | Family or friends: 50<br>With skin disease: 37<br>Without skin disease: 35<br>OM practitioner: 6<br>Media/internet: 6 | Those using CM who felt AD improved: 35                                  |

Continues

Table S1. Continued

| Main findings                  |                                                                                                                                      |                                       |                                      |                     |                                                                                                         |                   |                                                               |                                                          |                                                                                          |                     |                         |                                       |                                                                         |                                                                                             |
|--------------------------------|--------------------------------------------------------------------------------------------------------------------------------------|---------------------------------------|--------------------------------------|---------------------|---------------------------------------------------------------------------------------------------------|-------------------|---------------------------------------------------------------|----------------------------------------------------------|------------------------------------------------------------------------------------------|---------------------|-------------------------|---------------------------------------|-------------------------------------------------------------------------|---------------------------------------------------------------------------------------------|
| Author (year)                  | Aim (quote)                                                                                                                          | Population (n) and location           | Method                               | Sampling technique  | Question(s) asked (quote)                                                                               | Response rate (%) | Prevalence of use                                             | Most popular modalities (%)                              | Perceived effectiveness (%)                                                              | Adverse effects (%) | Costs (£)               | Predictors of CAM use                 | Source of CAM recommendation                                            | Other relevant findings (%)                                                                 |
| Jordan (2004) <sup>46</sup>    | '...to evaluate the prevalence of clinically diagnosed knee OA and the use of CAM in those patients'                                 | 828 patients with OA in England       | NM                                   | Non-random sampling | NM                                                                                                      | 56                | CAM 'drug therapies': 54.3                                    | Chiropractic: 7.7<br>Acupuncture: 6.2<br>Osteopathy: 4.5 | NM                                                                                       | NM                  | Median per month: 13.50 | NM                                    | NM                                                                      | Patients who had seen CAM therapist more likely to have also seen PT or hospital consultant |
| Kong (2005) <sup>48</sup>      | 'To assess the incidence of oral CAM usage by gastroenterology patients at a single university center and compare against controls'  | 1,409 gastroenterology patients in UK | Face-to-face questionnaire interview | Non-random sampling | NM                                                                                                      | NM                | For IBD: 49.5<br>For IBS: 50.9<br>For general GI diseases: 20 | NM                                                       | Patients reporting benefits of CAM with:<br>IBD: 41<br>IBS: 48<br>General GI disease: 45 | NM                  | NM                      | Females                               | NM                                                                      | Increasing numbers of IBD patients using CAM in addition to conventional therapy            |
| Ladenheim (2008) <sup>44</sup> | 'To determine the prevalence and purpose of CAMs use in people receiving treatment for HIV infection'                                | 293 patients with HIV in England      | Questionnaire                        | Non-random sampling | 'Checklist questionnaire to estimate the prevalence and purpose of herbal medicines and supplement use' | 79                | Taking herbal remedies or supplements: 61                     | Herbal remedies: 28.6                                    | NM                                                                                       | NM                  | NM                      | NM                                    | NM                                                                      | Issued with warnings due to CAM usage: 20                                                   |
| Lambert (2010) <sup>49</sup>   | '...to determine the extent of the use of CAM in a UK headache clinic'                                                               | 92 patients in England                | Questionnaire                        | NM                  | NM                                                                                                      | NM                | Used median of three different CAM therapies: 32              | NM                                                       | CAM users who perceived it as beneficial: 60                                             | NM                  | Spent <100: 54          | Employed with higher results from HIT | Friend/relative: 72<br>Doctor: 16<br>Nurse: 8<br>Self-recommendation: 4 | CAM users who had not disclosed it to doctor or nurse: 42                                   |
| Lewith (2002) <sup>15</sup>    | 'To evaluate the use of and attitudes to CAM among patients and all healthcare staff in the Southampton Cancer Care Directorate (UK) | 270 patients with cancer in England   | Questionnaire                        | NM                  | 'Are you currently taking or receiving any of these therapies?'                                         | 60                | 32                                                            | Aromatherapy: 19<br>Massage: 10<br>Acupuncture: 3.7      | Stated that CM helped them feel better: 35                                               | NM                  | NM                      | NM                                    | NM                                                                      | Would like to receive CM: 49                                                                |

Continues



Table S1. Continued

| Author (year)                     | Aim (quote)                                                                                                            | Population (n) and location                       | Method               | Sampling technique | Question(s) asked (quote)                                                                                    | Response rate (%) | Prevalence of use                                              | Most popular modalities (%)                                                              | Perceived effectiveness (%)                 | Main findings       |                  |                                                                                           | Other relevant findings (%)                                                          |
|-----------------------------------|------------------------------------------------------------------------------------------------------------------------|---------------------------------------------------|----------------------|--------------------|--------------------------------------------------------------------------------------------------------------|-------------------|----------------------------------------------------------------|------------------------------------------------------------------------------------------|---------------------------------------------|---------------------|------------------|-------------------------------------------------------------------------------------------|--------------------------------------------------------------------------------------|
|                                   |                                                                                                                        |                                                   |                      |                    |                                                                                                              |                   |                                                                |                                                                                          |                                             | Adverse effects (%) | Costs (£)        | Predictors of CAM use                                                                     |                                                                                      |
| Lorenc (2006) <sup>91</sup>       | 'To determine the prevalence and determinants of CAM use in a multi-ethnic paediatric outpatient population'           | 201 paediatric outpatients in England             | Questionnaire        | NM                 | 'The questionnaire investigated the use of CM...'                                                            | NM                | 37                                                             | Homeopathy and herbs                                                                     | NM                                          | NM                  | NM               | Word of mouth: 65                                                                         | CM use not reported to children's doctors: 54                                        |
| MacGibbon (2011) <sup>16</sup>    | '...to investigate the extent and nature of self-care practices in patients experiencing long term health problems...' | 3,060 patients with chronic conditions in England | Postal questionnaire | Random sampling    | NM                                                                                                           | 45                | Consulted CAM practitioner (6 months): 20.6                    | Osteopathy or Chiropractic: 36.5<br>Prayer: 13.8<br>Meditation: 11.7                     | NM                                          | NM                  | NM               | NM                                                                                        | Those reporting back pain more likely to have consulted CAM practitioner (p<0.001)   |
| Molesiatitis (2004) <sup>51</sup> | '...to determine the prevalence of CAM use among children with cancer...'                                              | 49 paediatric patients in UK                      | Postal questionnaire | NM                 | NM                                                                                                           | 51                | Since diagnosis: 32.7                                          | Aromatherapy: 50                                                                         | Perceived aromatherapy to be effective: 50  | NM                  | NM               | Media: 69.4<br>Healthcare professionals: 66.7<br>Own research: 33.3                       | Parents who used CAM who would recommend it to other parents in same situation: 93.8 |
| Molesiatitis (2005) <sup>52</sup> | '...to examine the use of CAM in a sample of colorectal cancer patients in Europe'                                     | 126 patients in several European countries        | NM                   | NM                 | NM                                                                                                           | NM                | Used CAM after diagnosis of cancer: Overall: 32<br>In UK: 29.6 | Herbal medicine: 48.7<br>Homeopathy: 20.5<br>Spiritual therapy: 15.4<br>Relaxation: 12.8 | Found CAM directly fought the disease: 26.3 | After CAM use: 2.1  | Per month: €16.2 | Friends: 50<br>Media: 35<br>Family: 27.5<br>Physician: 12.5<br>Nurse: 10                  | High levels of satisfaction with CAM also reported                                   |
| Molesiatitis (2005) <sup>53</sup> | '...to explore the use of CAM in cancer patients across a number of European countries'                                | 34 patients with cancer in UK                     | NM                   | NM                 | 'Which CAM therapy patients used before the diagnosis of cancer, since the diagnosis of cancer or currently' | NM                | Lifetime: 29.4                                                 | Herbs in 13/14 countries                                                                 | Found CAM of benefit: 22.4 (p<0.001)        | After CAM use: 4.4  | Per month: €123  | Friends: 56.5<br>Family: 29.1<br>Media: 28.4<br>Physician: 18.6<br>CAM practitioner: 12.9 | CAM use among countries: range 14.8–73.1%                                            |

Continues

Table S1. Continued

| Main findings                     |                                                                                                                     |                                                                |                               |                    |                                                                                 |                   |                                       |                                                                                                 |                                                             |                     |                         |                                                                                     |                                                                                             |                                                                                                                |
|-----------------------------------|---------------------------------------------------------------------------------------------------------------------|----------------------------------------------------------------|-------------------------------|--------------------|---------------------------------------------------------------------------------|-------------------|---------------------------------------|-------------------------------------------------------------------------------------------------|-------------------------------------------------------------|---------------------|-------------------------|-------------------------------------------------------------------------------------|---------------------------------------------------------------------------------------------|----------------------------------------------------------------------------------------------------------------|
| Author (year)                     | Aim (quote)                                                                                                         | Population (n) and location                                    | Method                        | Sampling technique | Question(s) asked (quote)                                                       | Response rate (%) | Prevalence of use                     | Most popular modalities (%)                                                                     | Perceived effectiveness (%)                                 | Adverse effects (%) | Costs (£)               | Predictors of CAM use                                                               | Source of CAM recommendation                                                                | Other relevant findings (%)                                                                                    |
| Mollesiotis (2006) <sup>54</sup>  | '...to assess the patterns of CAM use specifically in lung cancer patients in Europe'                               | 111 patients from eight European countries                     | NM                            | NM                 | NM                                                                              | NM                | After diagnosis of cancer: 12.5       | Herbal medicine: 48.1<br>Homeopathy: 11.5<br>Animal extracts: 11.5<br>Spiritual therapies: 11.5 | Found CAM directly fought the disease: 22.2                 | NM                  | Per month: €5           | Younger age with higher education level                                             | Friends: 65.4<br>Family: 30.8<br>CAM practitioners: 26.9<br>Media: 23.1<br>Physician: 11.5  | Herbal use increased by three times after diagnosis of cancer<br>Patients seemed quite satisfied with CAM used |
| Mollesiotis (2006) <sup>55</sup>  | 'To describe the use of CAM in breast cancer patients in Europe'                                                    | 38 patients with cancer in UK                                  | NM                            | Random sampling    | NM                                                                              | NM                | In UK since diagnosis of cancer: 38.2 | Herbal medicine: 46.4                                                                           | Mean (SD) score: 5.19 (1.43)                                | Reported AEs (2.5)  | Per month: €9.6         | Younger, higher education and previously received conventional treatment for cancer | Friends: 64.2<br>Media: 30.4<br>Family: 24.4<br>Physicians: 17.9<br>CAM practitioners: 13   | Women reporting no benefits from CAM used: 6.5                                                                 |
| Mollesiotis (2006) <sup>56</sup>  | '...to examine the patterns of CAM use in a sample of head and neck cancer patients...'                             | 75 patients with cancer in nine European countries (16% in UK) | NM                            | NM                 | NM                                                                              | NM                | Before or after diagnosis: 22.7       | Herbal medicine: 47<br>Visualisation: 11.8%                                                     | Mean (SD) who perceived moderate effectiveness: 4.40 (1.68) | Reported AEs (11.8) | Per month: €260.57      | Previous treatment for cancer                                                       | Friends: 47.1<br>Family: 29.4<br>Media: 23.5<br>CAM practitioners: 23.5<br>Physicians: 11.8 | Eightfold increase in use of herbs after diagnosis of cancer                                                   |
| Moore (2000) <sup>17</sup>        | '...to examine patterns and factors associated with the use of alternative medical therapy in patients with SLE...' | 211 patients with SLE in UK                                    | Questionnaire                 | NM                 | Which of 16 non-conventional therapies they had used in preceding 6 months      | 94                | Used at least one AT: 48.3            | Relaxation: 21.3<br>Massage: 19<br>Herbal medicine: 15.2                                        | NM                                                          | NM                  | NM                      | NM                                                                                  | NM                                                                                          | Herbal medicine used more commonly in UK than in US and Canada                                                 |
| Needleman (2010) <sup>18</sup>    | '...to assess the use of CAM in brain tumor patients...'                                                            | 33 patients with cancer in England                             | Postal questionnaire          | NM                 | '...to record the use of CAM by selecting treatments from a predefined list...' | NM                | 55                                    | Reiki<br>Reflexology<br>Acupuncture                                                             | NM                                                          | NM                  | Spent >1,000 on CAM: 9% | NM                                                                                  | Family and friends                                                                          | Patients who disclosed CAM use to treating oncologist: 22                                                      |
| Newsom-Davis (2009) <sup>19</sup> | '...to determine patients' pattern of use of CAM therapies...'                                                      | 200 patients with cancer in England                            | Self-completion questionnaire | NM                 | '...the nature of CAM use amongst cancer patients'                              | NM                | 22                                    | Homeopathy: 6.8<br>Evening primrose oil: 4.5                                                    | CAM users who 'noticed effects on their health': 41         | NM                  | Spent <10: 20           | NM                                                                                  | Friend: 11<br>Family: 10<br>CAM practitioner: 8                                             | Said CAM should be available on NHS: 55                                                                        |

Continues

Table S1. Continued

| Author (year)                 | Aim (quote)                                                                                                           | Population (n) and location           | Method               | Sampling technique                                      | Question(s) asked (quote)                                                     | Response rate (%) | Prevalence of use                           | Most popular modalities (%)                                                                                     | Perceived effectiveness (%) | Main findings       |                                          |                                                                                                   | Other relevant findings (%)                                                            |                                                                                                       |
|-------------------------------|-----------------------------------------------------------------------------------------------------------------------|---------------------------------------|----------------------|---------------------------------------------------------|-------------------------------------------------------------------------------|-------------------|---------------------------------------------|-----------------------------------------------------------------------------------------------------------------|-----------------------------|---------------------|------------------------------------------|---------------------------------------------------------------------------------------------------|----------------------------------------------------------------------------------------|-------------------------------------------------------------------------------------------------------|
|                               |                                                                                                                       |                                       |                      |                                                         |                                                                               |                   |                                             |                                                                                                                 |                             | Adverse effects (%) | Costs (£)                                | Predictors of CAM use                                                                             |                                                                                        | Source of CAM recommendation                                                                          |
| Nicoleau (2004) <sup>57</sup> | '...to quantify and qualify the use of CAM by patients referred to our contact dermatitis clinic'                     | 109 patients in England               | Questionnaire        | Non-random sampling                                     | NM                                                                            | 100               | Currently using CAM: 10<br>Had used CAM: 20 | Herbals: 51<br>Chinese herbals: 18<br>Ayurvedic medicine: 12<br>Aromatherapy: 18                                | Felt they improved: 30      | NM                  | NM                                       | Ethnicity                                                                                         | Family or friends with skin disease: 27%<br>Family or friends without skin disease: 24 | Believed that CAM should be available from NHS: 83                                                    |
| Ong (2002) <sup>58</sup>      | '...to establish the health status of users of CAM services in England'                                               | 14,868 people in England              | NM                   | Random sampling                                         | NM                                                                            | 64                | Consulted CAM practitioner (3 months): 7.8  | NM                                                                                                              | NM                          | NM                  | NM                                       | Females with longstanding illness, non-manual job, social class and high levels of GP service use | NM                                                                                     | CAM users also reported at least one chronic illness: 60                                              |
| Quinn (2005) <sup>84</sup>    | 'To ascertain the views and use of CAM among people with LBP'                                                         | 222 with LBP in Northern Ireland      | Questionnaire        | NM                                                      | NM                                                                            | NM                | 46                                          | Acupuncture: 21.6<br>Reflexology: 9.5                                                                           | Found CAM effective: 51     | NM                  | NM                                       | NM                                                                                                | NM                                                                                     | Found CAM more effective than OM: 46.3<br>Would consider it to treat LBP: 90.1                        |
| Rees (2000) <sup>59</sup>     | To measure 'the prevalence and costs of CAM use by women diagnosed with breast cancer in the South Thames NHS region' | 1,023 patients with cancer in England | Postal questionnaire | 'A regional cancer register as a survey sampling frame' | NM                                                                            | 74                | Since diagnosis of cancer: 12 months: 22.4  | Massage/aromatherapy/Chiropractic/osteopathy<br>Relaxation<br>Yoga<br>Meditation and spiritual or faith healing | NM                          | NM                  | Per year per 1,584 consultations: 16,883 | Younger age, more educated and had used CAM before                                                | NM                                                                                     | Those who visited practitioner in time since diagnosis who had used more than one type of therapy: 53 |
| Robinson (2008) <sup>23</sup> | 'To determine the prevalence and determinants of CAM use in a multi-ethnic paediatric outpatient population'          | 339 parents in England                | Questionnaire        | Non-random sampling                                     | Questionnaire adapted from standardised questionnaire by Simpson <i>et al</i> | 72                | Lifetime: 37                                | Homeopathy: 29.9<br>Herbals: 28<br>Osteopathy: 14                                                               | Believed CM worked: 60      | NM                  | Per use: 9.66                            | Child's poor health, parents' higher income and better education                                  | Friends/family: 51<br>Own decision: 27<br>Referral: 17                                 | Parents who did not report CM use to doctor: 54                                                       |

Continues

Table S1. Continued

| Main findings                |                                                                                                                                               |                                                  |               |                       |                                                                          |                   |                               |                                                                                        |                                         |                     |              |                       |                                                                                                                 |                                                                        |
|------------------------------|-----------------------------------------------------------------------------------------------------------------------------------------------|--------------------------------------------------|---------------|-----------------------|--------------------------------------------------------------------------|-------------------|-------------------------------|----------------------------------------------------------------------------------------|-----------------------------------------|---------------------|--------------|-----------------------|-----------------------------------------------------------------------------------------------------------------|------------------------------------------------------------------------|
| Author (year)                | Aim (quote)                                                                                                                                   | Population (n) and location                      | Method        | Sampling technique    | Question(s) asked (quote)                                                | Response rate (%) | Prevalence of use             | Most popular modalities (%)                                                            | Perceived effectiveness (%)             | Adverse effects (%) | Costs (£)    | Predictors of CAM use | Source of CAM recommendation                                                                                    | Other relevant findings (%)                                            |
| Rüdel (2008) <sup>24</sup>   | 'This study investigates alternative help-seeking strategies in a multi-ethnic community and examines the relationship with primary care use' | 268 mentally distressed people in England        | Questionnaire | Mixed-method sampling | 'Have you tried the strategy to resolve your distress?'                  | 54.3              | Used one or more CT: 56.6     | Prayer: 41.6<br>Herbal remedies: 34.5<br>Relaxation/massage: 29.2                      | NM                                      | NM                  | NM           | NM                    | NM                                                                                                              | Black Caribbeans who used complementary service: 60                    |
| Scott (2005) <sup>60</sup>   | '...to assess the use of CAM therapies in patients with cancer'                                                                               | 127 patients with cancer in Scotland and England | Questionnaire | NM                    | Questionnaire originally developed by Swisher <i>et al</i> <sup>66</sup> | NM                | 29                            | Relaxation: 25.7<br>Reflexology: 14.3<br>Spiritual healing: 14.3<br>Aromatherapy: 11.4 | Improved their physical well-being: 44  | NM                  | Average: 232 | NM                    | Media: 57<br>Friends: 57<br>Family: 31<br>CAM practitioner: 14<br>Medical doctor: 14<br>Nurse: 9<br>Internet: 9 | Mean (SD) satisfaction score on 10-item Likert-like scale: 5.39 (1.64) |
| Shakeel (2007) <sup>61</sup> | To investigate 'the prevalence and pattern of CAM use among children attending the paediatric otolaryngology department...'                   | 554 paediatric patients in Scotland              | NM            | Non-random sampling   | NM                                                                       | 59                | 12 months: 20<br>Lifetime: 29 | NM                                                                                     | Thought CAM was effective: 61           | NM                  | NM           | NM                    | Friends/family: 68<br>Healthcare professionals: 36<br>Media: 26<br>Books: 22<br>Internet: 12                    | Patients who would recommend CAM to others: 65                         |
| Shakeel (2008) <sup>62</sup> | '... to identify the prevalence and pattern of CAM use in a consecutive sample of patients admitted to three surgical units...'               | 430 surgical patients in Scotland                | NM            | Non-random sampling   | NM                                                                       | 95                | 12 months: 46<br>Lifetime: 68 | Herbals: 50<br>Non-herbals: 13                                                         | Thought CAM was effective: 174 patients | NM                  | NM           | NM                    | Family/friends: 62<br>Healthcare professionals: 26<br>Media: 27<br>Books/Internet: 5                            | Two-thirds failed to inform family physician about their use of CAM    |
| Shakeel (2008) <sup>63</sup> | '...to explore the use of [CAM] by patients attending a head and neck oncology clinic'                                                        | 200 patients with cancer in Scotland             | NM            | Non-random sampling   | NM                                                                       | 69                | 12 months: 26<br>Lifetime: 50 | Massage<br>Acupuncture<br>Chiropractic<br>Homeopathy                                   | Thought CAM was effective: 41           | NM                  | NM           | NM                    | Friends: 55<br>Media: 29<br>Healthcare professional: 18                                                         | Stated that family physician was unaware of use of CAM: 50             |

Continues

Table S1. Continued

| Author (year)                 | Aim (quote)                                                                                                                      | Population (n) and location                              | Method                  | Sampling technique | Question(s) asked (quote)                                             | Response rate (%) | Prevalence of use                | Most popular modalities (%)                                                                              | Perceived effectiveness (%)                | Main findings                      |                                      |                                                           |                                                                 |                                                                        |
|-------------------------------|----------------------------------------------------------------------------------------------------------------------------------|----------------------------------------------------------|-------------------------|--------------------|-----------------------------------------------------------------------|-------------------|----------------------------------|----------------------------------------------------------------------------------------------------------|--------------------------------------------|------------------------------------|--------------------------------------|-----------------------------------------------------------|-----------------------------------------------------------------|------------------------------------------------------------------------|
|                               |                                                                                                                                  |                                                          |                         |                    |                                                                       |                   |                                  |                                                                                                          |                                            | Adverse effects (%)                | Costs (£)                            | Predictors of CAM use                                     | Source of CAM recommendation                                    | Other relevant findings (%)                                            |
| Shakeel (2010) <sup>25</sup>  | '...to study the prevalence and pattern of CAM use among adult patients attending the ENT clinic'                                | 1,900 otolaryngology patients in Scotland                | Interview questionnaire | NM                 | Questionnaire composed of list of common herbal preparations and CAMs | 72                | 12 months: 36<br>Lifetime: 61    | Herbal medicine: 30<br>Massage: 27.6<br>Acupuncture: 22.3<br>Aromatherapy: 16.2                          | Thought CAM was effective: 54              | NM                                 | NM                                   | Middle-aged, highly educated, married or cohabiting women | Friends/family: 57<br>Media: 30.1<br>Health professionals: 24.9 | Would recommend CAM to others: 57                                      |
| Sharples (2003) <sup>82</sup> | 'To examine patients' reasons for seeking CAM in the National Health Service...'                                                 | 786 patients with various clinical conditions in England | Questionnaire           | NM                 | What were the reasons for seeking CAM?                                | 93                | >5 years: 100<br>Acupuncture: 19 | Homeopathy: 80<br>Acupuncture: 19                                                                        | Much improved: 67                          | Slightly worse: 2<br>Much worse: 3 | NM                                   | GP: 15<br>Doctor: 3                                       | Satisfied or very satisfied with care they received: 90         |                                                                        |
| Shaw (2008) <sup>26</sup>     | To provide quantitative data on prevalence of use and factors predicting use in a larger sample of primary care asthma patients' | 3,693 patients with asthma in England                    | Postal questionnaire    | Random sampling    | What was the reason for first using CTs for asthma?                   | 36                | 14.5                             | Homeopathy: 68.4<br>Herbal medicine: 63.2<br>Relaxation: 55.8<br>Acupuncture: 45.8<br>Aromatherapy: 43.1 | Reported CM always helped their asthma: 23 | NM                                 | 1-100: 33%<br>101-500: 16<br>>500: 4 | Middle-aged and highly educated females                   | Family member or friend: 11.8<br>Doctor: 4.2                    | Those who used CAM who had not disclosed it to health professional: 54 |
| Simpson (2001) <sup>64</sup>  | '...to determine the prevalence of CM use in children'                                                                           | 1,134 children aged <16 years in southwest England       | NM                      | Random sampling    | NM                                                                    | 79.7              | Used CAM: 17.9                   | Homeopathy: 61<br>Aromatherapy: 36.4<br>Herbals: 24<br>Osteopathy: 12.3                                  | NM                                         | NM                                 | <20/visit: 47<br>patients            | Word of mouth recommendation: 59.7                        | Dissatisfied with OM: 37                                        |                                                                        |
| Smith (2004) <sup>29</sup>    | 'To describe the physical and psychological symptoms of IBS, and the health-related quality of life of patients...'              | 503 patients with IBS in the UK                          | Telephone interview     | NM                 | NM                                                                    | 84                | Tried ATs: 15                    | Acupuncture<br>Massage<br>Hypnotherapy<br>Reflexology                                                    | NM                                         | NM                                 | NM                                   | NM                                                        | Seen in secondary care and used relaxation techniques: 30       |                                                                        |

Continues

Table S1. Continued

| Main findings                 |                                                                                         |                                                  |                      |                                          |                                                                                                                 |                   |                                                                                            |                                                                                                             |                             |                     |                        |                                                                                   |                                                              |                                                                                               |
|-------------------------------|-----------------------------------------------------------------------------------------|--------------------------------------------------|----------------------|------------------------------------------|-----------------------------------------------------------------------------------------------------------------|-------------------|--------------------------------------------------------------------------------------------|-------------------------------------------------------------------------------------------------------------|-----------------------------|---------------------|------------------------|-----------------------------------------------------------------------------------|--------------------------------------------------------------|-----------------------------------------------------------------------------------------------|
| Author (year)                 | Aim (quote)                                                                             | Population (n) and location                      | Method               | Sampling technique                       | Question(s) asked (quote)                                                                                       | Response rate (%) | Prevalence of use                                                                          | Most popular modalities (%)                                                                                 | Perceived effectiveness (%) | Adverse effects (%) | Costs (£)              | Predictors of CAM use                                                             | Source of CAM recommendation                                 | Other relevant findings (%)                                                                   |
| Thomas (2001) <sup>20</sup>   | To answer the question 'How many people go to complementary medicine practitioners?'    | 5,010 adults in England                          | Postal questionnaire | Stratified random sampling               | 'The questionnaire was developed in a previous study by Eisenberg <i>et al</i> ' <sup>97</sup>                  | 59                | Used at least one of eight CAMs or purchased OTC remedy: 12 months: 46.6<br>Lifetime: 28.3 | OTC herbals: 19.8<br>OTC homeopathy: 8.6<br>Osteopathy: 4.3<br>Chiropractic: 3.6                            | NM                          | NM                  | Per user per year: 108 | Middle-aged or elderly women                                                      | NM                                                           | Estimated 22 million visits made to practitioners of one of six established therapies in 1998 |
| Thomas (2004) <sup>65</sup>   | '... to estimate levels of use of CAMs and their socio-economic correlates'             | 2,761 individuals in England, Scotland and Wales | NM                   | Stratified, random, probability sampling | NM                                                                                                              | 65                | 12 months: 10                                                                              | Used one of five main therapies (acupuncture, homeopathy, chiropractic, osteopathy or herbal medicine): 6.5 | NM                          | NM                  | NM                     | Higher income, non-manual social class and full-time education after age 18 years | Friends or relatives: 59<br>GP or other NHS professional: 18 | Respondents who had used CAM in past year and had not told their GP: 52                       |
| Tremlett (2000) <sup>30</sup> | 'To determine the use of nonprescription medicines in a cohort of MS patients...'       | 148 patients with MS in Wales                    | Postal questionnaire | NM                                       | '...details about medicine usage in the previous 4 weeks from the GP, the pharmacy and from 'other' sources...' | 79                | Purchased non-prescription medicine within 1 month:† 63.2                                  | Herbals: 7.7                                                                                                | NM                          | NM                  | Per month: 8.85        | NS                                                                                | NM                                                           | Women spent significantly greater amount of money than men                                    |
| Vashist (2001) <sup>92</sup>  | 'To assess the usage of both conventional and CTs by peri- and postmenopausal women...' | 200 post menopausal women in England             | Questionnaire        | NM                                       | '... to mention any other complementary treatments they had tried'                                              | 100               | 68.5                                                                                       | St John's wort: 28.5<br>Homeopathy: 19.5<br>Acupuncture: 16.5<br>Spiritual healing: 11                      | Satisfied: 62               | NM                  | NM                     | Median younger age as a measure of central tendency (p=0.036)                     | GPs: 17<br>Doctors: 9                                        | Regular users of 137 women who had ever tried CAM: 66                                         |

Continues

Table S1. Continued

| Author (year)                  | Aim (quote)                                                                                           | Population (n) and location         | Method               | Sampling technique  | Question(s) asked (quote)                                  | Response rate (%) | Prevalence of use                                     | Most popular modalities (%)                                                        | Perceived effectiveness (%)  | Adverse effects (%) | Costs (£)         | Predictors of CAM use               | Source of CAM recommendation                            | Other relevant findings (%)                                                                                                  |
|--------------------------------|-------------------------------------------------------------------------------------------------------|-------------------------------------|----------------------|---------------------|------------------------------------------------------------|-------------------|-------------------------------------------------------|------------------------------------------------------------------------------------|------------------------------|---------------------|-------------------|-------------------------------------|---------------------------------------------------------|------------------------------------------------------------------------------------------------------------------------------|
|                                |                                                                                                       |                                     |                      |                     |                                                            |                   |                                                       |                                                                                    |                              |                     |                   |                                     |                                                         |                                                                                                                              |
| Wheeler (2008) <sup>67</sup>   | '...to determine whether absorption or cognitive style were predictors of CAM use...'                 | 131 students                        | Questionnaire        | Non-random sampling | NM                                                         | NM                | >50                                                   | Massage: 27<br>Aromatherapy: 23<br>Reiki: 17<br>Bach flowers: 12<br>Relaxation: 12 | NM                           | NM                  | NM                | Rationality and absorption          | NM                                                      | Most commonly used self-delivered CAMs: Aromatherapy: 25<br>Yoga: 19<br>Meditation: 17<br>Herbals: 15<br>Crystal healing: 14 |
| Wilkinson (2008) <sup>73</sup> | 'To determine the use of CTs by men with prostate cancer...'                                          | 405 patients with cancer in England | Postal questionnaire | NM                  | To read through list of 30 CTs they were currently using   | 73                | 25                                                    | Lycopene: 30<br>Yoga: 5<br>Reflexology: 5<br>Massage: 4<br>Acupuncture: 4          | Improved quality of life: 55 | NM                  | <10 per month: 55 | Younger age and bowel 'bother'      | Family: 18<br>Friends: 10<br>Newspaper: 10              | Users who had not informed any doctor about CT use: 42                                                                       |
| Zavery (2010) <sup>32</sup>    | 'This study outlines CAM use, and disclosure of CAM use, within a large sample of cancer patients...' | 431 patients with cancer in England | Interview            | Non-random sampling | Patients 'would be asked questions about their use of CAM' | NM                | Used one or more CAMs since diagnosis of cancer: 47.6 | Herbals: 22.3<br>Massage: 11.1                                                     | NM                           | NM                  | NM                | Women with primary cancer diagnosis | Family/friends: 26.9<br>Nurse: 20.9<br>Literature: 10.4 | Did not disclose CAM use to treating healthcare professional: 62.7                                                           |

Continues

AD = atopic dermatitis; AE = adverse event; AT = alternative treatment; CAM = complementary and alternative medicine; CM = complementary medicine; CT = complementary therapy; ENT = ear, nose and throat; GI = gastrointestinal; HIT = Headache Impact Test; IBD = inflammatory bowel disease; IBS = irritable bowel syndrome; LBP = low back pain; NPI = non-pharmacological interventions; MS = multiple sclerosis; NHS, National Health Service; NM = not mentioned; NS = not significant; OA, osteoarthritis; OM = orthodox medicine; OTC = over-the-counter; PMS = premenstrual syndrome; PT = physiotherapist; SD, standard deviation; SLE = systemic lupus erythematosus; TCM = traditional Chinese medicine.  
\*Estimate also include physical exercise, physiotherapy and psychotherapy.  
\*Estimate also includes non-steroidal anti-inflammatory drugs (NSAIDs), dietary supplements and vitamins.

**Table S2. Key data from surveys regarding specific CAM methods.**

| Author (year)                 | Aim (quote)                                                                                                                                                  | Population (n) and location           | Method                    | Sampling technique         | Question(s) asked (quote)                                                             | Response rate (%) | Prevalence of use                               | Most popular modalities (%)                                              | Perceived effectiveness (%) | Main findings       |           |                                                                                     |                                                   | Other relevant findings (%)                                                |
|-------------------------------|--------------------------------------------------------------------------------------------------------------------------------------------------------------|---------------------------------------|---------------------------|----------------------------|---------------------------------------------------------------------------------------|-------------------|-------------------------------------------------|--------------------------------------------------------------------------|-----------------------------|---------------------|-----------|-------------------------------------------------------------------------------------|---------------------------------------------------|----------------------------------------------------------------------------|
|                               |                                                                                                                                                              |                                       |                           |                            |                                                                                       |                   |                                                 |                                                                          |                             | Adverse effects (%) | Costs (£) | Predictors of CAM use                                                               | Source of CAM recommendation                      |                                                                            |
| Cappuccio (2001) <sup>7</sup> | To assess 'the prevalence and the predictors of regular use of non-prescribed vitamin supplements, cod liver oil, primrose oil, and garlic'                  | 1,557 volunteers in England           | Interview                 | Stratified random sampling | NM                                                                                    | 64                | 2 years: 10.4                                   | Cod liver oil, primrose oil or garlic: 5.3                               | NM                          | NM                  | NM        | Women of African origin and higher socioeconomic class                              | NM                                                | White and South Asian people were least common users of CAM                |
| Carson (2009) <sup>85</sup>   | '...to scope the level of awareness and utilisation of chiropractic amongst people with MS in the UK'                                                        | 231 patients with MS in UK            | Postal questionnaire      | Non-random sampling        | 'The main themes explored were the number of people who use chiropractic...'          | NM                | 91*                                             | Massage: 44<br>Chiropractic: 42<br>Oxygen therapy: 27<br>Reflexology: 24 | NM                          | NM                  | NM        | NM                                                                                  | Friend/relative: 47<br>Internet/support group: 35 | Had consulted GP prior to chiropractic use: 42                             |
| Catt (2006) <sup>70</sup>     | To explore 'the preferences for injection or tablets in the administration of breast cancer treatment'                                                       | 208 patients with cancer in UK        | Semi-structured interview | NM                         | Patients asked about treatment they were receiving                                    | NM                | Current use of non-prescription therapies: 53   | Garlic: 3.4<br>Echinacea: 1.9<br>Black cohosh: 1.9<br>Chinese herbs: 1.4 | NM                          | NM                  | NM        | Higher education, higher socio-economic status and higher internal locus of control | NM                                                | Self-treating, mainly with vitamin and mineral supplements: 53             |
| Gee (2002) <sup>38</sup>      | '...to assess patients' perception of Chinese herbal medicine in those with eczema and psoriasis so that we could provide an appropriate level of education' | 80 dermatological patients in England | NM                        | NM                         | NM                                                                                    | NM                | 1 month: 10                                     | NM                                                                       | NM                          | NM                  | NM        | Unaware of any AEs: 83–95%                                                          | NM                                                | Considered herbs as completely safe: 33                                    |
| Headley (2004) <sup>43</sup>  | 'To present data on the self-reported use of all types of medicinal products collected during pregnancy in a large cohort'                                   | 11,545 pregnant women in England      | Postal questionnaire      | NM                         | NM                                                                                    | 81.8              | Used at least one CAM product (12 months): 92.4 | Herbal medicine and homeopathy: 0.1†                                     | NM                          | NM                  | NM        | NM                                                                                  | NM                                                | Used herbs and homeopathy at 18 weeks†: 3.9                                |
| Hinks (2010) <sup>13</sup>    | 'To examine the reasons why patients choose acupuncture'                                                                                                     | 200 infertility patients in England   | Questionnaire             | NM                         | 'The questionnaires asked if patients had or wished to have acupuncture or other CAM' | 97                | 29                                              | Acupuncture: 22                                                          | NM                          | NM                  | NM        | NM                                                                                  | NM                                                | Gave more importance to acupuncture than seeing same doctor or nurse: 17.5 |

Continues



Table S2. Continued

Main findings

| Author (year)                    | Aim (quote)                                                                                                              | Population (n) and location                           | Method               | Sampling technique | Question(s) asked (quote)                                                       | Response rate (%) | Prevalence of use                       | Most popular modalities (%)                                    | Perceived effectiveness (%) | Adverse effects (%)            | Costs (£) | Predictors of CAM use                          | Source of CAM recommendation                                                                                                           | Other relevant findings (%)                                                                                                   |
|----------------------------------|--------------------------------------------------------------------------------------------------------------------------|-------------------------------------------------------|----------------------|--------------------|---------------------------------------------------------------------------------|-------------------|-----------------------------------------|----------------------------------------------------------------|-----------------------------|--------------------------------|-----------|------------------------------------------------|----------------------------------------------------------------------------------------------------------------------------------------|-------------------------------------------------------------------------------------------------------------------------------|
| Holst (2009) <sup>90</sup>       | '...to describe the use and the user of herbal remedies during pregnancy...'                                             | 578 pregnant women in England                         | Questionnaire        | NM                 | The survey was based on questionnaire developed by Nordeng (2004) <sup>98</sup> | 55.7              | During pregnancy: 57.8                  | Ginger, cranberry, and raspberry leaf                          | NM                          | NM                             | NM        | University degree and had been pregnant before | Family/friends: 61.8<br>Healthcare personnel: 21.3<br>CAM practitioner: 5.8                                                            | Users who did not tell doctor or midwife about use: >75%                                                                      |
| Howard (2005) <sup>83</sup>      | '...to determine the extent of use of cannabis in a cross-sectional sample of adult patients...'                         | 86 patients with SCD in England                       | Questionnaire        | NM                 | Questions on use of cannabis                                                    | 34                | 12 months: 36                           | Cannabis: 36                                                   | NM                          | Sleepiness and mood change: 37 | NM        | NM                                             | Would be willing to participate in future studies using cannabis for treatment of pain in SCD: 58                                      |                                                                                                                               |
| Mac Pherson (2006) <sup>90</sup> | '...to describe the characteristics of acupuncture patients...'                                                          | 9,408 patients with various clinical conditions in UK | Postal questionnaire | NM                 | NM                                                                              | NM                | 100                                     | Acupuncture                                                    | NM                          | NM                             | NM        | Women                                          | Self-referral: 39<br>Family/friends/colleagues: 34<br>NHS staff: 10                                                                    | Most common symptom: Musculoskeletal: 38<br>Psychological: 11<br>General: 9<br>Neurological: 8<br>Gynaecological/obstetric: 8 |
| Skinner (2002) <sup>27</sup>     | '...to quantify the use of herbal remedies in patients attending for anaesthesia in a British district general hospital' | 3,349 presurgical patients in England                 | Interview            | NM                 | Whether patient was presently taking herbal medication                          | 81.3              | Reported use of herbs: 4.8              | Garlic: 22.9<br>Ginseng: 18.1<br>Ginkgo: 16<br>Echinacea: 10.1 | NM                          | NM                             | NM        | Middle-aged females                            | NM                                                                                                                                     | Written documentation of patient's use of herbal remedies in medical notes: 1.5                                               |
| Smith (2004) <sup>28</sup>       | '...to estimate the prevalence of the use of herbal medicines by patients taking warfarin'                               | 2,600 patients taking warfarin in England             | Postal questionnaire | NM                 | Custom-made questionnaire                                                       | 54.2              | Reported taking one or more herbs: 19.2 | Herbs: 8.8<br>Garlic: 7.3<br>Ginkgo: 1.5<br>Ginseng: 1.0       | NM                          | Reported AEs: 2.5              | NM        | NM                                             | Patients had not discussed use of herbs with conventional healthcare professional: 92.2<br>Patients taking CAMs other than herbs: 14.3 |                                                                                                                               |

Continues

Table S2. Continued

| Main findings                   |                                                                                                                                       |                                               |                                 |                        |                                                                                             |                   |                                                                            |                                                                 |                                                       |                                     |           |                       |                                                      |                                                                      |
|---------------------------------|---------------------------------------------------------------------------------------------------------------------------------------|-----------------------------------------------|---------------------------------|------------------------|---------------------------------------------------------------------------------------------|-------------------|----------------------------------------------------------------------------|-----------------------------------------------------------------|-------------------------------------------------------|-------------------------------------|-----------|-----------------------|------------------------------------------------------|----------------------------------------------------------------------|
| Author (year)                   | Aim (quote)                                                                                                                           | Population (n) and location                   | Method                          | Sampling technique     | Question(s) asked (quote)                                                                   | Response rate (%) | Prevalence of use                                                          | Most popular modalities (%)                                     | Perceived effectiveness (%)                           | Adverse effects (%)                 | Costs (£) | Predictors of CAM use | Source of CAM recommendation                         | Other relevant findings (%)                                          |
| Thompson (2007) <sup>21</sup>   | 'To set a standard of routine goal setting with patients within their package of care at the Bristol Homeopathic Hospital'            | 110 patients with various clinical conditions | Questionnaire                   | NM                     | 'The questionnaire asked about past use of CAM...'                                          | 100               | Lifetime: 70                                                               | Homeopathy: 35                                                  | Believed homeopathy to be more effective than OMI: 41 | NM                                  | NM        | NM                    | GP: 58                                               | Valued emphasis on treating whole person: 73                         |
| Thompson (2010) <sup>22</sup>   | '...to describe the use of these products [homeopathy] in a large cohort of children from birth to 8.5 years of age'                  | 13,988 children in England                    | Longitudinal study              | NM                     | 'Has your toddler ever taken homeopathic medicines?'                                        | NM                | 11.8% of children up to the age of 8.5 years used homeopathy at least once | Chamomilla (at 18 months): 31.8<br>Arnica (at 103 months): 32.2 | NM                                                    | NM                                  | NM        | NM                    | Parents: 46.3<br>Homeopath: 14.7<br>GP: 10.1         | Confused about what constituted homeopathic product: 10              |
| Van Tonder (2009) <sup>31</sup> | To compare '... the usage, benefits and side-effects of dietary-related CAM use among adult cancer patients and non-cancer adults...' | 98 patients with cancer in England            | Self-administered questionnaire | Random sampling method | Whether health professionals were informed of CAM usage; CAM information sources; CAM usage | 77.3              | Used herbs: 36                                                             | Green tea: 15<br>Echinacea: 9<br>Garlic: 5                      | Stated they benefited from CAM: 41                    | Reported AEs (diarrhoea): 2         | NM        | NM                    | Family/ neighbours: 30<br>Media: 29<br>NHS staff: 25 | Patients with cancer who informed health professional of CAM use: 54 |
| Werneke (2004) <sup>66</sup>    | '...to establish the type, frequency and pattern of herbal medicine and supplement use...'                                            | 500 patients with cancer in England           | NM                              | NM                     | NM                                                                                          | 63.6              | 51.6                                                                       | Herbals: 10.4                                                   | NM                                                    | Issued warnings from pharmacy: 12.2 | NM        | NM                    | NM                                                   | Reported using supplements in higher than recommended doses: 11.0    |

\* Estimate also includes physiotherapy and diet management.

† Estimate includes all other therapeutic products, including herbal and homeopathic products on a regular basis.

AE = adverse event; CAM = complementary and alternative medicine; MS = multiple sclerosis; NM = not mentioned; OM = orthodox medicine; SCD = sickle cell disease.

**Appendix S1. Detailed search strategy for MEDLINE.**

- 1 (Alternative adj3 (heal\$ or medic\$ or remed\$ or therap\$ or treatment\$)).ti,ab.
- 2 (Complementary adj3 (heal\$ or medic\$ or remed\$ or therap\$ or treatment\$)).ti,ab.
- 3 (integrat\$ adj3 (heal\$ or medic\$ or remed\$ or therap\$ or treatment\$)).ti,ab.
- 4 CAM.ti,ab.
- 5 exp Complementary Therapies/
- 6 1 or 2 or 3 or 4 or 5
- 7 (caregiver\$ or care giver\$ or Carer\$ or Client\$ or Consumer\$ or Customer\$ or Patient\$ or User\$).ti,ab.
- 8 exp patients/
- 9 7 or 8
- 10 (Focus group\$ or Interview\$ or Question\$ or Survey\$).ti,ab.
- 11 exp health surveys/ or exp health care surveys/ or exp interviews as topic/ or exp questionnaires/
- 12 10 or 11
- 13 6 and 9 and 12
- 14 limit 13 to yr='2000 -Current'
